# Determinants of Compliance Behaviours among Patients Undergoing Hemodialysis in Malaysia

Yoke Mun Chan<sup>1,2\*</sup>, Mohd Shariff Zalilah<sup>2</sup>, Sing Ziunn Hii<sup>3</sup>

**1** Institute of Gerontology, University Putra Malaysia, Serdang, Malaysia, **2** Department of Nutrition and Dietetics, Faculty of Medicine and Health Sciences, University Putra Malaysia, Serdang, Malaysia, **3** Viva Life Science Private Limited, Petaling Jaya, Malaysia

## Abstract

**Background:** Patients with end stage renal disease often fail to follow prescribed dietary and fluid regimen, leading to undesirable outcomes. This study aimed to examine and identify factors influencing dietary, fluid, medication and dialysis compliance behaviours in patients undergoing hemodialysis.

**Methods:** This was a cross-sectional study which employed purposive sampling design. A total of 188 respondents were recruited from 14 dialysis centres in Malaysia between 2008–2011. Self-reported compliance behaviours and biochemical measurements were used as evaluation tools.

**Results:** Compliance rates of dietary, fluid, medication and dialysis were 27.7%, 24.5%, 66.5% and 91.0%, respectively. Younger, male, working patients and those with longer duration on hemodialysis were found more likely to be non-compliant. Lacks of adequate knowledge, inadequate self-efficacy skills, forgetfulness and financial constraints were the major perceived barriers towards better compliance to fluid, dietary, medication and dialysis, respectively.

**Conclusions:** Healthcare professionals should recognise the factors hindering compliance from the patients' perspective while assisting them with appropriate skills in making necessary changes possible.

**Citation:** Chan YM, Zalilah MS, Hii SZ (2012) Determinants of Compliance Behaviours among Patients Undergoing Hemodialysis in Malaysia. PLoS ONE 7(8): e41362. doi:10.1371/journal.pone.0041362

**Editor:** Emmanuel A. Burdmann, University of Sao Paulo Medical School, Brazil

**Received:** March 3, 2012; **Accepted:** June 20, 2012; **Published:** August 3, 2012

**Copyright:** © 2012 Chan et al. This is an open-access article distributed under the terms of the Creative Commons Attribution License, which permits unrestricted use, distribution, and reproduction in any medium, provided the original author and source are credited.

**Funding:** The authors have no funding or support to report.

**Competing Interests:** One of the authors, SZH is YMC's spouse who has contributed significantly to the study, as clarified in the Author's Contributions of the Cover Letter. The company (Viva Life Science Private Limited) however had no role in the funding, study design, data collection and analysis, decision to publish, or preparation of the manuscript. This does not alter the authors' adherence to all the PLoS ONE policies on sharing data and materials.

\* E-mail: yokemun@medic.upm.edu.my

## Introduction

In Malaysia, there is consistent increase in the incidence of newly-diagnosed individuals with end-stage renal disease (ESRD) which requires renal replacement therapy each year, fuelled by the expansion of the aged population as well as the rapid emergence of diabetic nephropathy [1]. While peritoneal dialysis is the preferred treatment modality in Hong Kong [2] and Mexico [3], hemodialysis is still the predominant mode of treatment for ESRD patients in most countries [4–5] including Malaysia [1]. Peritoneal dialysis is grossly underutilized in Malaysia despite the conscious effort by the government to promote peritoneal dialysis as the dialysis modality of choice. This is largely attributed to the readily available hemodialysis centres provided by non-government organisations (NGOs) and private sectors besides better survival rate for hemodialysis patients [1]. Successful hemodialysis is highly dependent on the lifetime commitment of patients to four aspects of regimens, namely dietary guidelines, fluid restriction, medication and dialysis [6]. Although compliance to hemodialysis regimens is critical in the management of hemodialysis patients as failure to do so has been associated with increased risk of medical complications including higher risk of cardiac disease [7], poorer quality of life and decreased life expectancy [8–9],

nonadherence to one or more aspects of hemodialysis treatment regimen has been widely reported [10–11].

The reported prevalence of non-compliance rates among hemodialysis patients varies widely, ranging from 30–74%, 2–81%, 17–46% and 0–32% for compliance to fluid restrictions [12–14], diet restrictions [11–12,15], medication [14,16–17] and dialysis [17–19], respectively. These variations were partly attributed to the different population being studied and most likely the inconsistency in the measures used to define compliance rates. A number of variables have been identified to influence compliance rate among hemodialysis patients, with varying degrees of agreement between different studies. More consistent reported demographic correlates of non compliant were younger age [15,17,20] and male patients [12,15,21]. Other variables include education [15,22], employment status [22–23], duration on dialysis [24–26], health locus of control and social support [27].

In view of the rapidly increased of ESRD in Malaysia, there is a need to determine the compliance rate to therapeutic regimen among patients undergoing hemodialysis. Previous study identified non-compliance to fluid intake was prevalent among patients undergoing hemodialysis in a single centre in Malaysia [28]. Data on compliance to other treatment regimes (dietary, medication and dialysis attendance) is however not available. Hence this present study aimed to determine the overall compliance

behaviour to therapeutic regimens among patients undergoing hemodialysis and to determine the factors contributing to compliance among these subjects.

## Materials and Methods

This was a cross-sectional study with respondents recruited from 14 hemodialysis centres in Malaysia. A total of 346 subjects were screened, 217 were found meeting the selection criteria while eventually 188 respondents consented to participate, giving a response rate of 87%. The study employed purposive sampling as the selection of respondents was based on several eligible criteria. The inclusion criteria entailed receiving hemodialysis for four hours thrice weekly; attended routine hemodialysis treatment for a minimum of three months prior to the study; at least 18 years of age, suffers from no major acute diseases or major psychological disorders. The study protocol was approved by the Medical Research Ethics Committee of Faculty of Medicine and Health Sciences, Universiti Putra Malaysia, in accordance with current guidelines on Good Clinical Practice and the Declaration of Helsinki. Following ethics review board approval, the researchers explained the study to potential participants. Anonymity and confidentiality were assured before signed individual consents were obtained from all subjects.

A set of structured questionnaire was developed to ascertain information on patients' demographic characteristics. Treatment conditions, medical history and proxy clinical measures include mean serum potassium and phosphorus levels for the last three measurements were retrospectively obtained from medical record. The modified Charlson's Comorbidity Index which has been validated in dialysis patients [29] was used to quantify subject's comorbidity score. Mean interdialytic weight gain (IDWG) which is defined as weight gain between two consecutive dialysis sessions for the past three months was obtained from subject's dialysis record. A 25-item dietary knowledge questionnaire, which was modified from Durose et al. (2004) [11], was used to assess subjects' knowledge on diet and fluid regimen including food sources for nutrients (e.g., chocolate is good food source for phosphorus), recommended dietary preparation/restriction (e.g., dark green leafy vegetables should be cut small before washing and immerse in water), and possible consequences of noncompliance to dietary recommendation (e.g., excessive intake of sodium and fluid is harmful to the heart). The answers were prepared in yes or no format with an additional "don't know" category to avoid bias attributable to guessing. Each correct response was given a score of one while zero score was given to incorrect or "don't know" response. The scores were weighted and converted to standardized normal distribution, giving a maximum score of 100 for the knowledge scale. The internal consistency (Cronbach's alpha) was 0.8, denoting a reasonable internal consistency of this instrument. A combination of objective and subjective measures was used to access the compliance rates in order to increase the reliability and validity of the compliance results [6].

### Objective measures

Interdialytic weight gain (IDWG), serum potassium and phosphorus which have been widely used in many studies [12–13,30] were used as indicators of fluid and dietary compliance. In view of the absence of validated international cut-off values, the existing acceptable limits used in the dialysis units were applied to identify non-adherers. Subjects were considered as dietary compliant when both serum potassium and phosphorus were within the acceptable ranges. Fluid compliant of subject was defined when mean IDWG for the past three months were within

the acceptable range. Predialysis serum phosphate was selected as compliance indicator for medication [14,22]. Dialysis compliance was determined as the number of appointment or dialysis session skipped compared to the prescribed sessions in a given duration. The data was gathered retrospectively from the subjects' dialysis record books. Attendance to dialysis was classified arbitrarily as non-compliant if subjects skipped at least one dialysis treatment in the month before enrolment into the study.

### Subjective Measures

To evaluate patients' compliance behaviour, a modified dialysis diet and fluid non-adherence questionnaire (DDFQ) [31] was used. There were eight subscales: two each (frequency and intensity) to measure the patients' compliance behaviour to dietary guidelines, fluid, prescribed phosphate binding medication and hemodialysis treatment, respectively. The frequency of non-compliance was assessed for the last 14 days while intensity of non-compliance was evaluated on a 5-point rating scale, where responses ranged from 0 as "very severe deviation" to 4 as "no deviation".

### Data Analysis

Analyses were performed using the SPSS Windows Version 18 (Chicago, IL). Data were presented as mean standard deviation for continuous variables and percentages for categorical variables. Pearson's product moment correlation coefficients were computed to determine the associations between continuous variables. Stepwise multivariate linear regression analysis was performed to identify variables that predict the compliance indicators. Statistical significance was defined at  $p < 0.05$ .

## Results

Subjects' characteristics are presented in Table 1. The mean age of subjects was 58 years old. There were 48.9% male and 51.1% female. A majority were married (80.3%) with more than half (51.1%) had at least completed secondary education. Approximately three-quarters were either retired or unemployed. Diabetes mellitus and glomerulonephritis were the two major known etiology of renal failure. The presence of co-morbidities was common in this sample, with hypertension being the most prevalent (67.0%) and followed by diabetes mellitus (46.3%).

As depicted in Table 2, while a total of 48.4% and 36.2% of the subjects perceived themselves as fluid or dietary compliant, approximately one-quarter of the subjects were actually adhered to dietary (27.7%) and fluid (24.5%) restrictions. Based on self-reported data, 16 subjects missed at least one dialysis session while the dialysis record book indicated 17 subjects actually skipped at least one dialysis session. This gave a high consistency in dialysis compliance rates between self-reported data and data retrieved from patients' dialysis record. On the other hand, self-reported compliance to medication was 50.5%, while clinically determined rate using serum phosphorus was 66.5%. The percentage of self-reported non-compliance (mild to very severe) to prescribed dialysis, medication, fluid and dietary recommendation were 8.5%, 49.5, 51.6% and 63.8%, respectively (Table 3). According to the degree of deviation, majority of the subjects deviated either mildly or moderately from the recommended regimens. There were however a total of 19.7% and 11.7% of the subjects reported severe and very severe degrees of deviation from dietary and medication recommendation, respectively.

Perceived barriers contributing to non-compliance to treatment regimens were identified and are shown in Table 4. A total of 86.2% of the subjects admitted compliant to fluid prescription was

**Table 1.** Demographics and clinical characteristics of subjects.

| Characteristics                    | Mean (SD)                  | Range   | %    |
|------------------------------------|----------------------------|---------|------|
| Age (years)                        | 58.2 (10.5)                | 23 – 75 |      |
| Sex                                | Male                       |         | 48.9 |
|                                    | Female                     |         | 51.1 |
| Marital status                     | Single                     |         | 12.8 |
|                                    | Married                    |         | 80.3 |
|                                    | Divorced/Widowed           |         | 6.9  |
| Education                          | No formal education        |         | 10.6 |
|                                    | Primary school             |         | 38.3 |
|                                    | Secondary school and above |         | 51.1 |
| Employment                         | Employed                   |         | 25.5 |
|                                    | Unemployed                 |         | 66.0 |
|                                    | Retired                    |         | 8.5  |
| Primary diagnosis of renal failure | Diabetes mellitus          |         | 25.5 |
|                                    | Glomerulonephritis         |         | 8.5  |
|                                    | Unknown cause              |         | 29.8 |
|                                    | Others                     |         | 37.1 |
| Duration of dialysis (months)      | 63.2 (39.3)                | 5 – 162 |      |
| Presence of co-morbidity           | Hypertension               |         | 67.0 |
|                                    | Diabetes mellitus          |         | 46.3 |
|                                    | Ischaemic heart disease    |         | 14.9 |
| Dry weight (kg)                    | 56.8 (14.0)                |         |      |
| Interdialytic weight gain (kg)     | 2.8 (0.7)                  |         |      |

doi:10.1371/journal.pone.0041362.t001

the most difficult and challenging aspect, especially during hot weather while 72.9% reported difficulty following their dietary prescription. This was followed by 52.1% who reported had difficulty taking medications as prescribed. The need to change eating habits and inability to resist favourite foods (88.1%) and the highly complexity of dietary recommendation (87.0%) were the major factors cited for dietary non-compliance, superimposed the knowledge factor (74.7%). On the other hand, lacking of knowledge or information pertaining to fluid management was the major factor cited for fluid non-compliance (92.8%) followed

by the complexity of fluid management. Forgetfulness, associated side effects/complications and complexity of the prescribed medications treatment were the three major factors perceived by patients contributing to non-compliance to medications. A majority (70.6%) of the subjects reported they had difficulty adhering to phosphate binder *per se* due to its associated side effects such as constipation and the unpleasant experience to take large quantities with meals. Large tablet burden was reported as barrier to compliance for 60.6% of the subjects. There were 12.2% of the subjects admitted having difficulty to comply with dialysis attendance attributed by financial constraint and lacks of transportation facility.

As shown in Table 5, there were positive correlations between age and compliance on dietary ( $r = 0.186, p < 0.05$ ), fluid ( $r = 0.385, p < 0.01$ ) and medication ( $r = 0.271, p < 0.01$ ), respectively, indicating younger subjects were more non-compliant to the therapeutic regimen compared to their older age counterparts. Female subjects were statistically more compliant to dietary ( $r = 0.252, p < 0.05$ ) and fluid restriction ( $r = 0.310, p < 0.01$ ). There was however no significant different between male and female subjects on medication compliance ( $r = 0.172, p > 0.05$ ). Employment status was found to be inversely related to dietary ( $r = -0.355, p < 0.01$ ) and fluid ( $r = -0.441, p < 0.01$ ) compliances. These results suggested that subjects who were employed were more likely to be non-compliant to dietary and fluid restrictions. Longer hemodialysis vintage was associated with poorer compliances on fluid ( $r = -0.410, p < 0.01$ ) and medication ( $r = -0.368, p < 0.01$ ), implying that patients who had longer lengths of time on dialysis were more likely to have hyperphosphatemia and gained more IDWG. Knowledge scores on potassium and phosphorus

**Table 2.** Comparison between clinically determined and self-reported compliance rates.

| Compliance Indicator   | Clinically Determined compliance rates (%) | Self-reported compliance rates (%) |
|------------------------|--------------------------------------------|------------------------------------|
| Dietary                | 27.7 <sup>1</sup>                          | 36.2                               |
| Fluid                  | 24.5 <sup>2</sup>                          | 48.4                               |
| Medication             | 66.5 <sup>3</sup>                          | 50.5                               |
| Attendance to dialysis | 91.0 <sup>4</sup>                          | 91.5                               |

<sup>1</sup>Both serum potassium and phosphorus achieved compliance criteria.<sup>2</sup>IDWG achieved compliance criteria.<sup>3</sup>Serum phosphorus achieved compliance criteria.<sup>4</sup>17 subjects skipped at least one dialysis session (data derived from dialysis record).<sup>5</sup>16 patients self-reported missing at least one dialysis session.

doi:10.1371/journal.pone.0041362.t002

**Table 3.** Self-reported of intensity of treatment compliance.

| Deviation of Regimen | Degree of deviation | Mean Compliance Score | Frequency | %    |
|----------------------|---------------------|-----------------------|-----------|------|
| Dietary              |                     | 2.73                  |           |      |
|                      | No deviation        |                       | 68        | 36.2 |
|                      | With deviation      |                       | 120       | 63.8 |
|                      | Mild                |                       | 50        | 26.6 |
|                      | Moderate            |                       | 33        | 17.5 |
|                      | Severe              |                       | 25        | 13.3 |
|                      | Very Severe         |                       | 12        | 6.4  |
| Fluid*               |                     | 3.06                  |           |      |
|                      | No deviation        |                       | 90        | 48.4 |
|                      | With deviation      |                       | 96        | 51.6 |
|                      | Mild                |                       | 34        | 18.3 |
|                      | Moderate            |                       | 50        | 26.9 |
|                      | Severe              |                       | 8         | 4.3  |
|                      | Very Severe         |                       | 4         | 2.1  |
| Medication           |                     | 3.03                  |           |      |
|                      | No deviation        |                       | 95        | 50.5 |
|                      | With deviation      |                       | 93        | 49.5 |
|                      | Mild                |                       | 34        | 18.1 |
|                      | Moderate            |                       | 37        | 19.7 |
|                      | Severe              |                       | 14        | 7.4  |
|                      | Very Severe         |                       | 8         | 4.3  |
| Dialysis             |                     | 3.91                  |           |      |
|                      | No deviation        |                       | 172       | 91.5 |
|                      | With deviation      |                       | 16        | 8.5  |
|                      | Mild                |                       | 16        | 8.5  |
|                      | Moderate            |                       | 0         | 0    |
|                      | Severe              |                       | 0         | 0    |
|                      | Very Severe         |                       | 0         | 0    |

\*Two subjects refused to disclosure information.  
doi:10.1371/journal.pone.0041362.t003

were negatively correlated with compliance on dietary ( $r = -0.345$ ,  $p < 0.01$ ) and medication ( $r = -0.278$ ,  $p < 0.05$ ), respectively. On the other hand, there were no significant correlations between knowledge scores on fluid or sodium with dietary, fluid or medication compliance. These findings suggest that higher knowledge on dietary aspects may not associated with better compliance rates.

Self-reported dietary compliance score was positively correlated with compliance on dietary ( $r = 0.236$ ,  $p < 0.05$ ) and medication ( $r = 0.197$ ,  $p < 0.05$ ), while self-reported medication compliance score was correlated with compliance on medication ( $r = 0.412$ ,  $p < 0.01$ ). There were also significant correlations between fluid compliance with self-reported compliance score on fluid ( $r = 0.342$ ,  $p < 0.05$ ) and dialysis ( $r = 0.213$ ,  $p < 0.05$ ). These data may suggest that the self-reported data can be used to determine the compliance behaviors of hemodialysis patients, in the absence of clinical measures. On the other hand, there were no significant associations between compliance indicators and education level or family income.

Stepwise multivariate linear regression analyses were performed to identify variables that predict the compliance behaviours. As displayed in Table 6, higher fluid compliant was predicted by

female gender ( $\beta = 0.207$ ,  $p < 0.05$ ), older age ( $\beta = 0.195$ ,  $p < 0.05$ ), higher self-reported fluid compliance score ( $\beta = 0.168$ ,  $p < 0.05$ ), shorter hemodialysis vintage ( $\beta = -0.155$ ,  $p < 0.01$ ) and being not employed ( $\beta = -0.125$ ,  $p < 0.05$ ). Meanwhile, higher dietary compliance was predicted by higher self-reported dietary compliance score ( $\beta = 0.250$ ,  $p < 0.05$ ), female gender ( $\beta = 0.162$ ,  $p < 0.05$ ), older age ( $\beta = 0.147$ ,  $p < 0.05$ ) and no employment ( $\beta = -0.142$ ,  $p < 0.05$ ) while higher medication compliance was significantly predicted by higher self-reported medications compliance score ( $\beta = 0.353$ ,  $p < 0.01$ ), shorter hemodialysis vintage ( $\beta = -0.224$ ,  $p < 0.05$ ) and older age ( $\beta = 0.181$ ,  $p < 0.05$ ). The variation for these three models ranged from 21.5–39.2%.

## Discussion

Diabetes mellitus accounted for the primary renal disease in this cohort of study, which is also a characteristic reported by the national renal registry of Malaysia [1]. A high proportion of hemodialysis patients in Malaysia had difficulty in following diet and fluid restriction. This finding is consistent with the range of compliance behaviours reported in other studies among dialysis patients [12–13,28]. Compared to a recent study conducted in Hong Kong [26], our compliance rates on dietary and dialysis

**Table 4.** Perceived barriers contributing to non-compliance on treatment regimens.

|                                  |                                                           | Dietary (%) | Fluid (%) | Medication (%) | Dialysis Attendance (%) |
|----------------------------------|-----------------------------------------------------------|-------------|-----------|----------------|-------------------------|
| Non-compliance Rate <sup>1</sup> |                                                           | 63.8        | 51.6      | 49.5           | 8.5                     |
| Difficult to comply <sup>2</sup> |                                                           | 72.9        | 86.2      | 52.1           | 12.2                    |
| Perceived barriers               | Lacks of knowledge or information <sup>3</sup>            | 74.7        | 92.8      | 55.4           | NA                      |
|                                  | Affects food preference                                   | 88.1        | 64.2      | 36.1           | NA                      |
|                                  | Alters lifestyle <sup>4</sup>                             | 69.2        | 56.8      | 54.7           | NA                      |
|                                  | Complexity <sup>5</sup>                                   | 87.0        | 75.4      | 75.8           | NA                      |
|                                  | Side effects/Complications                                | NA          | NA        | 78.3           | NA                      |
|                                  | Forgetfulness                                             | NA          | NA        | 80.6           | NA                      |
|                                  | Large tablet burden                                       | NA          | NA        | 60.6           | NA                      |
|                                  | Financial constraint and lacks of transportation facility | NA          | NA        | NA             | 100                     |

<sup>1</sup>Data derived from Table 2.

<sup>2</sup>Percentage of subjects who admitted having difficulty adhering to the treatment regimens (multiple responses were possible).

<sup>3</sup>Lacks of knowledge (e.g. water allowance for different weather conditions, type of foods to be consumed or restricted).

<sup>4</sup>Alters lifestyle (e.g. the need to consume mega dosage of supplements and medicines).

<sup>5</sup>Complexity (e.g. Nutrient composition of different foods; when and how to consume phosphate binders).

doi:10.1371/journal.pone.0041362.t004

were comparable, but the compliance rates on fluid and medication were 24% and 39% lower. We compared with another study in United States [24] and found that their compliance rates of diet, fluid and medication were 26–47% higher than those reported in our study. A recent publication on the diabetes control also revealed that there was poor compliance on diet, exercise and self-monitoring blood glucose among type 2 diabetics in Malaysia [32]. Although evidence is still lacking to

generalise whether Malaysians are less likely to adhere to medical regimes than other populations, the available data suggest that extra efforts and appropriate strategies are needed to assist our hemodialysis patients to achieve the desirable recommendations, especially on fluid and medication.

The findings that our subjects perceived themselves as more compliant to dialysis than medication prescription, dietary or fluid restrictions are similar to earlier studies [24,26,33]. This may be attributed by the need for higher willpower, more appropriate knowledge and skill to achieve dietary and fluid recommendations. The mean self-reported compliance rates for fluid and dietary

**Table 5.** Correlation between compliance behaviors and variables.

| Variables                      |            | Dietary Compliance | Fluid Compliance | Medication Compliance |
|--------------------------------|------------|--------------------|------------------|-----------------------|
| Age                            |            | 0.186*             | 0.385**          | 0.271**               |
| Sex <sup>1</sup>               |            | 0.252*             | 0.310**          | 0.172                 |
| Education level                |            | -0.124             | -0.102           | -0.108                |
| Employment Status              |            | -0.355**           | -0.441**         | -0.187                |
| Family income                  |            | -0.129             | -0.138           | -0.115                |
| Vintage on hemodialysis        |            | -0.152             | -0.410**         | -0.368**              |
| Knowledge scores on            | Potassium  | -0.345**           | 0.167            | 0.109                 |
|                                | Phosphorus | 0.162              | 0.134            | -0.278*               |
|                                | Fluid      | 0.087              | 0.123            | -0.153                |
|                                | Sodium     | 0.113              | -0.162           | 0.144                 |
| Self-reported Compliance score | Dietary    | 0.236*             | 0.166            | 0.197*                |
|                                | Fluid      | -0.174             | 0.342*           | -0.156                |
|                                | Medication | -0.151             | -0.152           | 0.412**               |
|                                | Dialysis   | 0.137              | 0.213*           | 0.102                 |

<sup>1</sup>Female is a reference group in sex.

\*p<0.05.

\*\*p<0.01.

doi:10.1371/journal.pone.0041362.t005

**Table 6.** Standardized coefficients of the linear regression model predicting compliance.

| Compliance Behaviors | Variables                    | Standardized coefficients (β) | Adjusted R <sup>2</sup> |
|----------------------|------------------------------|-------------------------------|-------------------------|
| Fluid                | Age                          | 0.207                         | 0.392                   |
|                      | Sex <sup>1</sup>             | 0.195                         |                         |
|                      | Fluid compliance score       | 0.168                         |                         |
|                      | Hemodialysis vintage         | -0.155                        |                         |
| Dietary              | Employment <sup>2</sup>      | -0.125                        | 0.341                   |
|                      | Dietary compliance score     | 0.250                         |                         |
|                      | Age                          | 0.162                         |                         |
|                      | Sex <sup>1</sup>             | 0.147                         |                         |
| Medication           | Employment <sup>2</sup>      | -0.142                        | 0.215                   |
|                      | Medications compliance score | 0.353                         |                         |
|                      | Hemodialysis vintage         | -0.224                        |                         |
|                      | Age                          | 0.181                         |                         |

<sup>1</sup>Female is a reference group in sex.

<sup>2</sup>Job engagement is a reference group in employment.

doi:10.1371/journal.pone.0041362.t006

were 9% and 19% higher than the clinically determined rates. Other studies have also reported that hemodialysis patients consistently overestimated their compliance to fluid and dietary recommendations [13,27,34]. There is no clear explanation for this, but it is likely that the long duration of dependence on dialysis (length of time on dialysis) may cause hemodialysis patients to accustom to the restrictions imposed by the disease and perceived themselves as having better compliance than they actually did. Secondly, the use of clinical data for example serum potassium and phosphorus as the direct measures of dietary compliance could be misleading as these clinical data may also be affected by factors such as dialysis adequacy, medication and other factors yet to be identified. On the other hand, self-reported medication compliance was found to be underestimated by 16% as compared to clinically measured compliance indicator. Tomasello et al. (2004) [35] reported a similar finding where non-compliance to treatment was 58% and 31% when assessed using clinical and self-report measures, respectively. This may provide an impetus that using a single indicator to document the overall medication compliance rate could be insufficient and thus more comprehensive assessment tool is therefore needed.

Older age appeared to be the most important predictor among all predictor variables, explaining variance in all three compliance behaviours. Other studies have also reported that older age was associated with higher compliances to fluid restriction and medication prescription [24,36–37]. Possible explanations are older patients may have more structured lifestyle that accommodates the demands of the treatment regimen while younger patients may perceive themselves as less vulnerable to negative health outcomes [38], confirming the existence of an “intentional noncompliance” [39]. The finding that younger patients were more likely to be non-compliant to treatment recommendation may lead to the future poorer quality of life and higher rates of mortality among these dialysis patients. The dialysis patients in Malaysia are perceived as relatively young [40]. In view of the younger cohort of dialysis patients together with the higher tendency of these patients to be non-compliant to treatment, it is highly recommended that action plans need to be formulated to address the projected higher mortality rates and poorer quality of life among our dialysis population. We shared that women were more compliant to diet and fluid restriction than men and this findings are similar to other studies [12,26,31]. Female hemodialysis patients had consistently reported to have a lower adjusted hazard ratio for mortality compared to their male counterparts in Malaysia [1]. It is likely that women are more health conscious than men. How gender differences in compliance may benefit patients concerning health outcomes in the long run however deserves for longitudinal research.

The correlations between higher self-reported compliance to medication and dietary compliance with lower phosphorus levels are of particular importance. Cardiovascular events are the leading cause of death in dialysis patients. The increased incidence of cardiovascular event in dialysis patients is associated with hyperphosphatemia [30], making phosphate control an important goal of treatment. While dialysis *per se* cannot remove the significant quantities of phosphate from the body, the appropriate restriction in dietary phosphorus intake and use of phosphate binder are therefore critically important to manage hyperphosphatemia. It is then necessary for hemodialysis patients to comply with *both* the dietary phosphorus intake and phosphate binding medication in reducing the risk of adverse clinical outcomes.

We demonstrated that higher knowledge scores were not associated with better compliance rates, which suggest that

knowledge is not the sole factor related to compliance rate. This finding is congruent with other studies [11–12,37]. While Zrinyi et al. (2003) [23] showed that employment may improve the dietary compliance and it is associated with better patient-staff relationships, we found that hemodialysis patients who were employed were more likely to be non-compliant to diet and fluid restriction. This concurs with other study [13]. Working dialysis subjects may consume more outside foods that contain generally higher amount of sodium and potassium, which could lead to a higher challenge in handling thirst stimulus and subsequent increased in serum potassium level.

We found that subjects with longer duration on hemodialysis were more non-compliant. This finding concurs with other studies [13,25,41]. It is postulated that end stage renal disease patients may be more eager to change their dietary habits to meet the requirement of a newly-received life-saving hemodialysis treatment. However as time passes, these patients may feel bored and easily get frustrated with the need to comply with long lists of dietary and fluid restrictions [26]. Patients new to dialysis treatment may also receive more social support and were therefore higher degree of compliant is expected [26]. However, over the long run, it may be difficult for patients to resist the wide variety of food available. In view of this, healthcare providers should identified the individual's perceived barrier, explore patients' willingness and readiness to make changes to their dietary habits to achieve the optimum effect of compliance.

In conclusion, the majority of our subjects were compliant to dialysis prescription. However, compliance to other regimens especially for fluid and diet restriction remains poor. Younger male, working patients and those with long experience with dialysis warrant increased scrutiny and deserve for special attention and support. Besides knowledge, lacking of appropriate self-efficacy skills and regimen complexity were the perceived barriers hindering better compliance from the patients' perspective. Healthcare professionals should recognize that the perceived barriers to compliance vary according to types of treatment. For example, while adequate knowledge and information are needed to improve fluid compliance, appropriate self-efficacy skills and coping strategies are needed to enable hemodialysis patients to achieve the optimum effect of dietary compliance. Messages deliver by the healthcare professional should be “simple and practical”, allowing the patients to understand and practice the messages within their capabilities. Reinforcement of messages together with more frequent counseling encounters may promote a better understanding of the prescriptions subsequently a higher compliance rates among the patients.

Our study design was cross-sectional in nature and the sample size was relatively small which could limit the cause-effect interpretation and generalisation of finding. Selection bias is also possible where only patients who were generally healthier or more health conscious were more likely to participate in the study. Despite these limitations, the study highlighted several important findings that require further investigations using stronger research design and larger sample size.

## Author Contributions

Conceived and designed the experiments: YMC MSZ SZH. Performed the experiments: YMC SZH. Analyzed the data: YMC. Contributed reagents/materials/analysis tools: YMC MSZ SZH. Wrote the paper: YMC. Critically reviewed the paper for important intellectual content and provided technical support: MSZ SZH.

## References

- Lim YN, Ong LM, Goh BL (2011) 18<sup>th</sup> Report of the Malaysian Dialysis and Transplant Registry 2010. Retrieved from Clinical Research Centre of Ministry of Health Malaysia: [http://www.msn.org.my/nrr/documents/nrr\\_report2011/contents.pdf](http://www.msn.org.my/nrr/documents/nrr_report2011/contents.pdf). Accessed 2012 April 5.
- Yu AW, Chau KF, Ho YW, Li PK (2007) Development of the "peritoneal dialysis first" model in Hong Kong. *Perit Dial Int* 27 (Suppl 2): S53–S55.
- Cueto-Manzano AM, Rojas-Campos E (2007) Status of renal replacement therapy and peritoneal dialysis in Mexico. *Perit Dial Int* 27(2): 142–148.
- Tan CC, Chan CM, Ho CK, Wong KS, Lee EJ, et al. (2005) Health economics of renal replacement therapy: perspectives from Singapore. *Kidney Int* 67 (Suppl 94): S19–S22.
- United States Renal Data System (USRDS), 2009. USRDS annual data report. Accessed from <http://www.usrds.org/adr.html>. Accessed 2012 March 18.
- Wolcott DL, Maida CA, Diamond R, Nissenson AR (1986) Treatment compliance in end-stage renal disease patients on dialysis. *Am J Nephrol* 6 (5), 329–338.
- Karamanidou C, Clatworthy J, Weinman J, Horne R (2008) A systematic review of the prevalence and determinants of nonadherence to phosphate binding medication in patients with end-stage renal disease. *BMC Nephrology* 9: 2.
- Baines LS, Jindal RM (2000) Non-compliance in patients receiving haemodialysis: an in-depth review. *Nephron* 85(1): 1–7.
- Hoover H (1989) Compliance in patients on hemodialysis: a review of the literature. *J Am Diet Assoc* 89(7): 957–959.
- Denhaerynck K, Manhaeve D, Dobbels F, Garzoni D, Nolte C, et al. (2007) Prevalence and consequences of nonadherence to hemodialysis regimens. *Am J Crit Care* 16(3): 222–236.
- Durose CL, Holdsworth M, Watson V, Przygodzka F (2004) Knowledge of dietary restrictions and the medical consequences of noncompliance by patients on hemodialysis are not predictive of dietary compliance. *J Am Diet Assoc* 104(1): 35–41.
- Kugler C, Vlaminck H, Haverich A, Maes B (2005) Nonadherence with diet and fluid restrictions among adults having hemodialysis. *J Nurs Scholarsh* 37(1): 25–29.
- Lee SH, Molassiotis A (2002) Dietary and fluid compliance in Chinese hemodialysis patients. *Int J Nurs Stud* 39(7): 695–704.
- Lin CC, Liang CC (1997) The relationship between health locus of control and compliance of hemodialysis patients. *Kaohsiung J Med Sci* 13(4): 243–254.
- Bame SL, Petersen N, Wray NP (1993) Variation in hemodialysis patient compliance according to demographic characteristics. *Soc Sci Med* 37(8): 1035–1043.
- Betts DK, Crotty GD (1988) Response to illness and compliance of long-term hemodialysis patients. *J Am Nephrol Nurses Assoc* 15(2): 96–100.
- Leggat JE, Orzol SM, Hulbert-Shearon TE, Golper TA, Jones CA, et al. (1998) Noncompliance in hemodialysis: predictors and survival analysis. *Am J Kidney Dis* 32(1): 139–145.
- Bleyer AJ, Hylander B, Sudo H, Nomoto Y, de la Torre E, et al. (1999) An international study of patient compliance with hemodialysis. *JAMA* 281(13): 1211–1213.
- Sherman RA, Cody RP, Matera JJ, Rogers ME, Solanchick JC (1994) Deficiencies in delivered hemodialysis therapy due to missed and shortened treatments. *Am J Kidney Dis* 24(6): 921–923.
- Kimmel PL, Peterson RA, Weihs KL, Simmens SJ, Boyle DH, et al. (1995) Behavioral compliance with dialysis prescription in hemodialysis patients. *J Am Soc Nephrol* 5(10): 1826–1834.
- Everett KD, Sletten C, Carmach C, Brantley PJ, Jones GN, et al. (1993) Predicting noncompliance to fluid restrictions in hemodialysis patients. *Dialysis Transplant* 22: 614–620.
- Curtin RB, Svarstad BL, Keller TH (1999) Hemodialysis patients' noncompliance with oral medications. *J Am Nephrol Nurses Assoc* 26(3): 307–316.
- Zrinyi M, Juhasz M, Balla J, Katona E, Ben T, et al. (2003) Dietary self-efficacy: determinant of compliance behaviours and biochemical outcomes in haemodialysis patients. *Nephrol Dial Transplant* 18(9): 1869–1873.
- Kim Y, Evangelista LS (2010) Relationship between illness perceptions, treatment adherence, and clinical outcomes in patients on maintenance hemodialysis. *Nephrol Nurs J* 37(3): 271–280.
- Kimmel PL, Varela MP, Peterson RA, Weihs KL, Simmens SJ, et al. (2000) Interdialytic weight gain and survival in hemodialysis patients: effects of duration of ESRD and diabetes mellitus. *Kidney Int* 57(3): 1141–1151.
- Lam LW, Twinn SF, Chan SW (2010) Self-reported adherence to therapeutic regimen among patients undergoing continuous ambulatory peritoneal dialysis. *J Adv Nurs* 66(4): 763–773.
- Brown J, Fitzpatrick R (1988) Factors influencing compliance with dietary restrictions in dialysis patients. *J Psychosom Res* 32(2): 191–196.
- Barnett T, Tang LY, Pinikahana J, Tan SY (2008) Fluid compliance among patients having haemodialysis: can an educational programme make a difference? *J Adv Nurs* 61(3): 300–306.
- Beddhu S, Bruns EJ, Saul M, Seddon P, Zeidel ML (2000) A simple comorbidity scale predicts clinical outcomes and costs in dialysis patients. *Am J Med* 108:609–613.
- Block GA, Hulbert-Shearon TE, Levin NW, Port FK (1998) Association of serum phosphorus and calcium x phosphate product with mortality risk in chronic hemodialysis patients: a national study. *Am J Kidney Dis* 31(4): 607–617.
- Vlaminck H, Maes B, Jacobs A, Reyntjens S, Evers G (2001) The dialysis diet and fluid non-adherence questionnaire: validity testing of a self-report instrument for clinical practice. *J Clin Nurs* 10(5): 707–715.
- Mafauzy M, Hussein Z, Chan SP (2011) The status of diabetes control in Malaysia: Results of DiabCare 2008. *Med J Malaysia* 66(3): 175–181.
- Mok E, Tam B (2001) Stressors and coping methods among chronic haemodialysis patients in Hong Kong. *J Clin Nurs* 10(4): 503–511.
- Cummings KM, Becker MH, Kirscht JP, Levin NW (1982) Psychosocial factors affecting adherence to medical regimens in a group of hemodialysis patients. *Med Care* 20(6): 567–580.
- Tomasello S, Dhupar S, Sherman RA (2004) Phosphate binders, K/DOQI guidelines, and compliance: the unfortunate reality. *Dialysis Transplant* 33(5): 236–242.
- Kara B, Caglar K, Kilic S (2007) Nonadherence with diet and fluid restrictions and perceived social support in patients receiving hemodialysis. *J Nurs Scholarsh* 39(3): 243–248.
- Park KA, Choi KS, Sim YM, Kim SB (2008) Comparison of dietary compliance and dietary knowledge between older and younger Korean hemodialysis patients. *J Ren Nutr* 18(5): 415–423.
- Kutner NG (2001) Improving compliance in dialysis patients: does anything work? *Semin Dial* 14(5): 324–327.
- Hussey LC, Gilliland K (1989) Compliance, low literacy, and locus of control. *Nurs Clin N Am* 24(3): 605–611.
- Schober-Halstenberg HJ (2009) End-stage renal disease in aging societies: a global perspective. *J Ren Nutr* 19(5 Suppl): S3–S4.
- Oka M, Chaboyer W (1999) Dietary behaviors and sources of support in hemodialysis patients. *Clin Nurs Res* 8(4): 302–314.
